# Supplementary material
Source: publisher figshare collection journal article supplement (https://gsapubs.figshare.com/ndownloader/files/25774283)
Supplement: Supplementary file 1 [file 25774283]

## Sheet: S2
Site	Sample_type	Source	Sample_name	Profile_number	Midpoint_m	Density_g_cm3	Density_unc	Porosity	Porosity_unc	Bulk_tau	Bulk_tau_unc	Volumetric_strain	Volumetric_strain_unc	FPC	FPC_unc	FPP	FPP_unc	Zr	Ti	Nb	Sc	V	Cr	Co	Ni	Cu	Zn	Ga	As	Se	Rb	Sr	Y	Mo	Cd	Sn	Te	Ba	La	Ce	Nd	Hf	Bi	Th	U
Soaproot	Regolith	This study	19SG079SRC	1	2.01016	1.37	0.0411	0.483019	0.0155094	-0.229088	0.0441151	0.49118	0.085332	0.474284	0.0687242	0.525716	0.0687242	117.4	8945.1	9.2	2.8	91.4	27.3	21.6	5.6	5.3	96.5	19.8	9.2	2.8	62.5	401.8	13.2	0.4			9.5	734	14.1	52.1	27.8		3.2	9.7	5.7
Soaproot	Regolith	This study	19SG080SRC	1	2.53746	1.01	0.0303	0.618868	0.011434	-0.208334	0.0487182	1.07714	0.127825	0.336637	0.0671857	0.663363	0.0671857	110.2	8710.6	8.6	4	83	18.6	18.7	5.2	4.5	89.2	20.7	4.6	1.2	58.5	391.4	13.3	0.6	7.3	5.4	4.7	709.5	28	67	19.7	0.4	1.6	12.8	7.4
Soaproot	Regolith	This study	19SG081SRC	1	3.06476	0.88	0.0264	0.667925	0.00996226	-0.18648	0.0411093	1.44981	0.123795	0.279193	0.0549828	0.720807	0.0549828	122.9	8476.6	7.6	4.2	84.1	17.5	27.2	5.8	5.3	86.9	20.5	5.7	1.5	76.5	441.9	12.9	1.1	0.8	2.8	4.2	612.7	18.7	52.3	18.8		1.2	9.6	6.2
Soaproot	Exclude	This study	19SG082SRC	1	3.59207	1.74	0.0522	0.343396	0.0196981	0.00375332	0.0406035	0.528705	0.0618386	-0.01093	0.119089	1.01093	0.119089	123.9	6870.1	11.3	2.5	74.4	21.8	30	6.6	3.5	73.7	18.7	6.2	1.6	109.1	313.4	14.3	0.5	2.5	2.9	8.6	614.6	30.8	65.4	22.3	1.3	3	34.3	8.3
Soaproot	Regolith	This study	19SG084SRC	2	0.6096	0.62	0.0186	0.766038	0.00701887	-0.342266	0.0231471	1.81128	0.0989351	0.4468	0.025864	0.5532	0.025864	183.6	10484.3	13	8.9	109.7	47.3	42.1	25.7	15.7	109.4	23.5	15.3	2.3	110.8	229.2	16.9	2.9	1.3	0.7	3.5	801.5	25.1	79.7	29.7	6.5	3.8	16.3	4.6
Soaproot	Regolith	This study	19SG085SRC	2	1.48285	0.73	0.0219	0.724528	0.00826415	-0.371662	0.0268334	1.28095	0.0974089	0.512971	0.0298905	0.487029	0.0298905	164.7	10974.8	11.9	9.3	108.1	49.2	19.4	24.4	14.7	108	23.7	11.1	2.1	107.6	219.9	16.4	1.6		0.2	2.7	735.6	21	56.7	19.3	0.5	1.9	13.8	6.5
Soaproot	Regolith	This study	19SG086SRC	2	2.01016	0.88	0.0264	0.667925	0.00996226	-0.40078	0.0262372	0.80447	0.0790098	0.600038	0.029293	0.399962	0.029293	167.4	11508.1	11.8	9.5	115.5	42.3	18.6	20.1	12.8	102	24	12.6	3	90	218	14.6	2	3.7	4.8	8.4	669.5	15.7	73.2	22.4	0.7	5.6	16	3.2
Soaproot	Regolith	This study	19SG087SRC	2	2.53746	1.05	0.0315	0.603774	0.0118868	-0.427456	0.0314787	0.444991	0.0794463	0.707975	0.0368736	0.292025	0.0368736	147.1	12044.3	11.8	10.8	117	32.7	16.6	15.9	12	93.8	24.8	11.4	3.4	85.9	166.1	11.9	1.5	5.7	4.7	10.2	720	17.7	81.8	22.3	1.5	4.4	17.3	6.1
Soaproot	Regolith	This study	19SG088SRC	2	3.06476	1.36	0.0408	0.486792	0.0153962	-0.454849	0.0284852	0.0622425	0.0555042	0.93438	0.0519522	0.06562	0.0519522	157.8	12649.5	11.3	7.2	141.5	30.8	15.9	14.4	10.2	86.4	23.1	5.2	1.6	76.4	181.9	16.8	2	4.7	4.9	9.7	693.4	42.9	63.8	41.4	4.7	0.9	18	5.3
Soaproot	Regolith	This study	19SG089SRC	2	3.59207	1.08	0.0324	0.592453	0.0122264	-0.356649	0.0345463	0.578593	0.0847664	0.601987	0.042377	0.398013	0.042377	138	10718.7	10.1	6.5	115.3	26.7	17.6	10.2	6.9	75.3	21.5	7.2	1.5	52.4	301.4	17.9	0.8			2.9	656.8	44.4	61.5	38		2.1	14.6	6.3
Soaproot	Regolith	This study	19SG090SRC	2	4.11937	1.1	0.033	0.584906	0.0124528	-0.290262	0.0435387	0.709823	0.104889	0.496254	0.0570793	0.503746	0.0570793	118.4	9716.1	9	4.8	120.7	36.5	31.4	7.6	7.2	78.6	20.8	7.1	1.6	61.2	334.9	10.6	1.7	2.8	2.7	8.7	879.6	26.8	23.9	15.3	2.9	2.9	15.2	6.8
Soaproot	Regolith	This study	19SG092SRC	2	5.17398	1.26	0.0378	0.524528	0.0142642	-0.303812	0.0480954	0.464206	0.101153	0.579209	0.0662354	0.420791	0.0662354	111.1	9905.2	9	4.7	124.6	18	17.9	5.4	5.5	85.5	21.8	10.1	2.3	70.6	301.2	9.1	1.2	3.2		0.4	825.4	29.8	50.8	20.8	2	2.8	14	8.8
Soaproot	Regolith	This study	19SG093SRC	2	5.70128	1.37	0.0411	0.483019	0.0155094	-0.204443	0.0541103	0.538851	0.104666	0.423261	0.0868614	0.576739	0.0868614	103.2	8668	8.7	2.7	89.5	16.9	26.2	6.8	9.3	87.8	20.6	5.4	2.2	81.1	382	9.6	1.3		0.8	3	684.2	30.9	40.8	24		2	14.1	6.4
Soaproot	Regolith	This study	19SG094SRC	2	6.22859	1.73	0.0519	0.34717	0.0195849	-0.188567	0.0588598	0.242947	0.0901609	0.543154	0.120832	0.456846	0.120832	98	8498.4	7.4	3.1	78.3	21.6	21.5	6.3	4	90.2	21.3	3.9	2.2	76.6	450	9.5	1	4.5	2.1	3.7	667.4	13.9	52.6	20.3	0.2	2.5	10.8	6
Soaproot	Regolith	This study	19SG095SRC	2	6.75589	2.02	0.0606	0.237736	0.0228679	-0.162501	0.0485785	0.0986996	0.0637292	0.683535	0.148737	0.316465	0.148737	110.4	8233.9	8.2	5.7	92.6	18	15.7	3.9	34.9	69.6	19.1	8.1	1.4	85.1	481.5	9.3	2.6	1.1	2.6	5.6	906.6	25.2	45.7	15.2	0.6	2.8	15.4	6.4
Soaproot	Regolith	This study	19SG097SRC	3	0.6096	0.6	0.018	0.773585	0.00679245	-0.28986	0.0210497	2.13645	0.0929697	0.374697	0.0241794	0.625303	0.0241794	197.3	9710.6	12.7	6.9	100.1	49	23	26.9	19.9	117.2	23.3	8	1.4	119.7	208	16.4	1.8	1.3	3.2	6.3	849.6	21.2	64.2	22.4	3.4	2.7	16.1	3
Soaproot	Regolith	This study	19SG098SRC	3	1.48285	0.81	0.0243	0.69434	0.00916981	-0.319059	0.0210497	1.22777	0.0688664	0.459515	0.0248622	0.540485	0.0248622	197.3	10127	12.4	8.4	100.9	44.4	22	26.1	16.8	108.3	23.4	11	2.7	104.7	206.7	16.2	1.9	6.5	5.7	9.8	802.7	27.2	63.5	21.5	1.8	3	18.6	5.2
Soaproot	Regolith	This study	19SG099SRC	3	2.01016	0.85	0.0255	0.679245	0.00962264	-0.315035	0.0316336	1.13548	0.0986223	0.463801	0.037834	0.536199	0.037834	146.6	10067.5	11	4.8	96.7	28.2	18.6	12.8	14.5	102	23.3	8.8	2.6	82.3	279.2	13.5	0.9	0.4		4.9	712.3	19.6	56.8	19.5		2.3	14	4.5
Soaproot	Regolith	This study	19SG100SRC	3	2.53746	0.99	0.0297	0.626415	0.0112075	-0.264721	0.0410582	0.968171	0.109903	0.422597	0.0533606	0.577403	0.0533606	123	9378.6	8.8	3.8	87.7	17.7	19.5	6.9	8.7	90.7	23.6	11.2	2.5	69.4	310.7	9.4	0.6	7.4	4.9	9.5	737.3	25.9	40	12.4	3	3	10.5	4.7
Soaproot	Regolith	This study	19SG101SRC	3	3.06476	1	0.03	0.622642	0.0113208	-0.322345	0.0418905	0.795786	0.11101	0.517706	0.0516622	0.482294	0.0516622	121.4	10176.1	8.7	4.8	93	18.7	17.2	6.3	12.9	85.1	22.6	13.5	2.6	74.6	221.2	8.5	0.8	3.4	6.6	10.3	744.9	24.6	31.3	12.6	1.4	5	8.6	2.8
Soaproot	Regolith	This study	19SG102SRC	3	3.59207	0.99	0.0297	0.626415	0.0112075	-0.145756	0.0812596	1.28661	0.217513	0.232683	0.117267	0.767317	0.117267	80.9	8072.5	14.9	4.3	74.7	17.9	13.1	7.9	7.2	75.4	18.1	11.1	2.5	120.9	159	13.1	0.2	2.9	1.5	2.4	805.5	32.2	53.6	28.3		2.6	13.2	5.2
Soaproot	Regolith	This study	19SG103SRC	3	4.11937	1.07	0.0321	0.596226	0.0121132	-0.212888	0.0483704	0.949389	0.119796	0.357059	0.0679135	0.642941	0.0679135	110.7	8761	8.3	7.1	80.1	17.2	16.8	5.1	7.7	77.5	22.5	8.1	2.5	75.6	320.7	15.9	0.6			3.3	592.4	65	78.6	33.2		3.2	12.5	6.2
Soaproot	Regolith	This study	19SG105SRC	3	5.17	2.26	0.0678	0.14717	0.0255849	-0.137043	0.0482325	0.0118738	0.0565559	0.931193	0.302732	0.0688073	0.302732	110.9	7991	7.4	2.1	78.1	17.5	23.2	6.1	5.2	91.2	20.5	5.1	0.9	74.9	490.4	10.8	1.2	1.8	1.5	6.1	598.5	16.5	40.4	14.9		2.5	10.6	4.5
Fine Gold	Regolith	This study	19SG021FGC-A	1	0.19	1.54	0.0462	0.42	0.017434	0.00860254	0.0388539	0.768329	0.0668591	-0.0204822	0.0914655	1.02002	0.0914655	187.3	7819.4	5.8	9.9	112.6	65.7	20.3	23.2	26.4	70.9	18.7	7.8	1.8	57.7	238.7	20.9	0.7	7.1	2.9	5.9	453.9	22.9	29.6	17	1.8	2.2	7.5	2.3
Fine Gold	Regolith	This study	19SG021FGC-B	1	0.37	1.54	0.0462	0.42	0.017434	-0.0709436	0.0329908	0.628865	0.0567699	0.168913	0.0694261	0.834873	0.0694261	104.1	8488.9	5.4	6.2	136.3	79.1	32.6	28.6	31.1	71.9	17.3	8.5	2.4	52.9	295.9	23.8	0.7	4	2.2	6.5	320.3	23.3	30	11.7	1.6	3.1	6	3.1
Fine Gold	Regolith	This study	19SG021FGCX-A	2	0.36	1.34	0.0402	0.5	0.0151698	-0.0306457	0.0359009	0.953177	0.0709981	0.0612914	0.0690881	0.939159	0.0690881	122.4	8136	5.3	9.4	102.1	40.5	26.1	16.8	15.4	75.8	19.1	5.2	1	47.1	303.4	18.2	1.4	0.3	0.8	7.8	363.5	19.7	23.2	18.1	0.3	1.9	5.4	2.3
Fine Gold	Regolith	This study	19SG021FGCX-B	2	0.72	1.34	0.0402	0.5	0.0151698	-0.205678	0.0241581	0.6005	0.0477753	0.411356	0.0376894	0.591669	0.0376894	73	9928.8	4.5	10.9	122.9	45.2	25	8.5	5.4	79.6	20	6.7	0.5	22.1	419.9	15.5	1.3			0.6	232.5	14.4	23.6	16.4	1.8	2.9	5	1.9
Fine Gold	Regolith	This study	19SG022FGCX	2	0.89916	2.13	0.0639	0.2	0.0241132	-0.202271	0.0243644	0.0112056	0.0303125	1.01136	0.107498	0.0418736	0.107498	70.2	9886.4	4.3	6.4	119.2	39.2	21	8.4	7	74.7	19.5	6.8	1.6	21.9	426.7	14.8	2.3			0.7	206.5	6.3	13.7	15		1.4	4.8	3.6
P301	Regolith	Hayes et al., 2019	CZG1-0	1	0.7	0.96	0.0288	0.65	0.0108679	-0.247	0.0303749	1.079	0.119159	0.38	0.0407513	0.612735	0.0407513	171.5	5604.38	10.4	10.9	116.5	44.7	51.4	10	6.1	93.7	21.3	7.9	1.6	113.2	299.2	20.3	0.6	6.8	6.6	7.3	937.7	34.7	62.2	26		1.6	12.1	1.4
P301	Regolith	Hayes et al., 2019	CZG1-1	1	1.7	1.28	0.0384	0.52	0.0144906	-0.297	0.0273572	0.456	0.0726846	0.571154	0.0417435	0.425721	0.0417435	183.7	6047.94	10.1	12.9	123.6	30	43.6	10.2	7	101	22.3	4.3	2.1	142.2	162.1	20.1	0.6	4.6	2.2	6.8	987.3	47	85.3	30.4	1.2	1.4	15.2	2.7
P301	Regolith	Hayes et al., 2019	CZG1-2	1	2.7	1.27	0.0381	0.52	0.0143774	-0.17	0.0353305	0.731	0.0920541	0.326923	0.0573471	0.673396	0.0573471	155.7	5970.02	12.6	12.4	112.1	36.3	44.8	10.8	4.2	93.3	22.7	9.2	2.1	201	137.7	21.6	0.5	3.7	3.9	6.6	756.9	34.8	56.6	18.4	0.1	2.3	23.7	3.7
P301	Regolith	Hayes et al., 2019	CZG1-3	1	3.7	1.12	0.0336	0.58	0.0126792	-0.314	0.0263822	0.624	0.0850108	0.541379	0.0368304	0.456358	0.0368304	188.2	7054.93	11.3	12.6	139.4	41.5	50.1	9.8	9.4	82.1	26.3	14.4	1.1	182.6	57.3	24.3	6.1		4.3	12.6	715.2	44.1	79.4	29.4	1.4	1.6	11	22.5
P301	Regolith	Hayes et al., 2019	CZG1-4	1	4.7	1.35	0.0405	0.49	0.015283	-0.258	0.029681	0.456	0.0722276	0.526531	0.0472213	0.473882	0.0472213	174.1	6527.46	10.7	9.3	119.4	50.3	42.2	12.9	6.3	128.1	22.4	8	2.1	128.8	158.3	23.2	1.1		4.7	12.5	809.5	36.5	49.4	26.8	4.5	1.9	14.1	4.7
P301	Regolith	Hayes et al., 2019	CZG1-5	1	5.7	1.36	0.0408	0.49	0.0153962	-0.262	0.0294476	0.438	0.0712767	0.534694	0.0471575	0.461777	0.0471575	175	6713.27	10.4	8.6	118.1	45.1	46.7	12.1	5.7	118.5	21.2	6.9	2.3	120	248.4	21.7	1.1	2.3	7.1	8.4	830	36.9	69.4	26.7	2.1	2.2	22	4
P301	Regolith	Hayes et al., 2019	CZG1-6	1	6.7	1.38	0.0414	0.48	0.0156226	-0.195	0.0337087	0.546	0.0788459	0.40625	0.0565114	0.593158	0.0565114	160.4	6071.91	9.3	7.7	108.7	27.9	46.6	9.9	4.4	112.5	21.4	4	1.7	108.9	253.1	18.9	0.9	4.4	4.7	3.6	739.3	20.8	71.7	29.4	1.1	2.7	17.3	1.5
P301	Regolith	Hayes et al., 2019	CZG1-7	1	7.7	1.49	0.0447	0.44	0.0168679	-0.227	0.0316205	0.375	0.067284	0.515909	0.0555461	0.48152	0.0555461	167.1	6641.34	9.7	9.5	116.6	50.6	56.7	10.8	4.3	126.3	21.5	8.3	0.9	118.3	253.4	19.9	0.7		1.2	6.2	741.5	30.3	27	22.9	2.1	0.4	9.7	3.1
P301	Regolith	Hayes et al., 2019	CZG1-8	1	8.7	1.58	0.0474	0.4	0.0178868	-0.261	0.0294991	0.239	0.0585792	0.6525	0.0571267	0.353242	0.0571267	174.8	6623.36	10.6	9.3	123	35.9	61.9	11.5	3.7	143.3	22.8	6.3	1	127.6	232.1	20.1	1	5.9	5.7	7.3	703.5	29.1	57.4	21.8	0.5	2.1	11.6	2.1
P301	Regolith	Hayes et al., 2019	CZG1-9	1	9.7	1.72	0.0516	0.35	0.0194717	-0.18	0.034658	0.263	0.0613175	0.514286	0.0746191	0.486817	0.0746191	157.6	6155.83	12	11.4	110.9	56.2	52.3	10.6	3.7	128.2	23.8	9.2	0.9	129.3	199.3	21.4	0.3	0.8	4.8	9.8	636	21.6	61.3	23.5	2.1	3.3	15.5	4.1
P301	Regolith	Hayes et al., 2019	CZG1-10	1	10.2	1.64	0.0492	0.38	0.018566	-0.194	0.0337749	0.303	0.0633355	0.510526	0.0672442	0.491384	0.0672442	160.2	5862.12	9.7	7.8	103	30.5	43.6	9.9	21.9	114.9	22.4	7.8	1.3	138.7	278	18.2	1.1		2.5	3.3	859.4	15.2	52.3	20.1	0.9	1.9	15.6	0.7
P301	Regolith	Hayes et al., 2019	CZG6-0	6	0.7	1.06	0.0318	0.6	0.012	-0.34	0.0248774	0.649	0.087367	0.566667	0.033803	0.433104	0.033803	195.8	5772.21	11	10.4	114.3	29.3	47.4	12.4	10	97.7	21.3	5.4	1.5	132.6	149.1	17.5	1.6	1.3	4	3.6	894.8	31.9	57.7	30.2	0	1.2	16.3	4.1
P301	Regolith	Hayes et al., 2019	CZG6-2	6	2.7	1.28	0.0384	0.52	0.0144906	-0.25	0.0301851	0.553	0.0788881	0.480769	0.0462871	0.516501	0.0462871	172.2	6029.95	10	9.2	117.7	29.5	44	11.7	6.8	106.3	22.7	10	1.1	121.5	203.7	18.6	0.5		2.2	6	1058	44.2	63.8	19.8	1.9	0.4	18.3	5.2
P301	Regolith	Hayes et al., 2019	CZG6-3	6	3.7	1.22	0.0366	0.54	0.0138113	-0.155	0.0363658	0.835	0.0993585	0.287037	0.0583819	0.712702	0.0583819	152.9	8949.03	13.6	20	202.1	103.2	44.3	30.8	34.9	175.6	25	4.5	2.8	145.6	212	39.9	1.4	3.2	3.5	11.5	530.2	56.3	73.2	53.8		3	9	2.5
P301	Regolith	Hayes et al., 2019	CZG6-4	6	4.7	1.35	0.0405	0.49	0.015283	-0.006	0.0474681	0.952	0.109882	0.0122449	0.0961169	0.987775	0.0961169	129.9	4585.4	7.7	8.5	82.1	28	64	7.1	4.7	71.9	18.5	8.4	0.6	100.3	350.1	15.5	0.5	1.3	4.3	6.8	1757.4	35.1	58.9	17.4		0.9	13.8	0.8
P301	Regolith	Hayes et al., 2019	CZG7-0	7	0.7	1.21	0.0363	0.54	0.0136981	-0.211	0.0326494	0.963	0.0911529	0.390741	0.0461139	0.647195	0.0461139	144.1	4945.04	8.4	5.6	93.3	57.7	46.9	9.1	6.5	84.3	20.4	3.2	1.3	100.7	364.2	16	1.6	3.1	5.5	3.6	868.6	36.3	76.9	17.8	0.4	1.1	14.9	3.4
P301	Regolith	Hayes et al., 2019	CZG7-1	7	1.7	1.26	0.0378	0.52	0.0142642	-0.12	0.0388228	0.85	0.100536	0.230769	0.0658572	0.771134	0.0658572	146.8	4705.28	9.3	10.4	94	36	53.3	8.4	12.2	84	21.4	4.7	1.6	112.2	245.2	22.4	0.7	0.2	6.5	13.9	801.8	50.7	85.4	37.6		3.1	19.1	5.8
P301	Regolith	Hayes et al., 2019	CZG7-2	7	2.7	1.39	0.0417	0.47	0.0157358	-0.212	0.0325872	0.502	0.07563	0.451064	0.054196	0.554028	0.054196	163.9	4489.5	10.1	8.6	100.5	36.8	47.5	10.6	9.7	90.7	21.3	4	1	111.8	282.4	22.2	0.9	5	4.7	6.2	902.4	47.3	69	38.3	3.5	2.6	15.5	7.4
P301	Regolith	Hayes et al., 2019	CZG7-3	7	3.7	1.35	0.0405	0.49	0.015283	-0.238	0.0309014	0.495	0.0749713	0.485714	0.0495163	0.514584	0.0495163	169.6	5406.58	10.2	12.6	115.8	31.7	47.2	9.8	9.5	95.8	20.6	4.7	1.3	114.4	287.4	24.5	0.8	6	6	13	900.1	49	64.6	36.1	0.8	1	13	9
P301	Regolith	Hayes et al., 2019	CZG7-4	7	4.7	1.57	0.0471	0.41	0.0177736	-0.259	0.0296548	0.251	0.0595122	0.631707	0.0566562	0.364688	0.0566562	174.2	5646.34	9.9	7.3	115.3	33.4	54.2	10.6	7.9	96.7	20.2	8.8	1.7	107	377.2	20.4	1.3	5.9	4.4	3.7	739.7	22.7	67.1	29.7	4.2	2.1	14.3	4.9
P301	Regolith	Hayes et al., 2019	CZG7-5	7	5.7	1.77	0.0531	0.33	0.0200377	-0.175	0.035009	0.235	0.0597013	0.530303	0.0792623	0.472866	0.0792623	156.6	5862.12	9.3	6.3	102.8	23.5	54.7	9.3	7.3	89.9	20.6	7.9	1.7	100.9	398.1	17.8	1.2	4.2	3.3	3.6	794.7	34.1	44.6	5.6	2.8	0.1	16.4	5.9
P301	Regolith	Hayes et al., 2019	CZG7-6	7	6.7	1.52	0.0456	0.42	0.0172075	-0.207	0.0329006	0.382	0.0678833	0.492857	0.0594837	0.514306	0.0594837	162.9	5466.52	9.4	8	111.5	34	51.8	9.5	6.9	93.4	19.7	9.4	2	100.3	364.8	20.4	1.2	5.7	6	4.6	689.1	19	65.1	24.6	0.4	2.3	13.9	3.8
P301	Regolith	Hayes et al., 2019	CZG7-7	7	7.7	1.46	0.0438	0.45	0.0165283	-0.147	0.0369044	0.547	0.0796071	0.326667	0.0680709	0.672321	0.0680709	151.5	5940.05	9.1	7.4	108.4	36.4	61.3	9.5	15.4	91.8	19.4	9.9	1.6	96	365.9	18.9	1.3		4	8	729	32.4	60	18.3	0.3	1.7	18.6	4.3
P301	Regolith	Hayes et al., 2019	CZG7-8	7	8.7	1.39	0.0417	0.48	0.0157358	-0.35	0.0243456	0.239	0.0586945	0.729167	0.0437415	0.263752	0.0437415	198.7	5364.62	12.6	10.2	151.3	36	56.5	14.7	10.6	122.1	21.3	5.9	1.7	132	383.4	22.8	1.3	7	10.3	11.2	898.6	29.9	68.4	26.4	0.6	2.7	19.3	2.3
P301	Regolith	Hayes et al., 2019	CZG7-9	7	9.7	1.48	0.0444	0.44	0.0167547	-0.187	0.0342112	0.455	0.0731752	0.425	0.0612219	0.576192	0.0612219	158.9	7462.52	10.4	10.2	130.4	38.3	53.5	13.5	10.1	110.5	20.4	7.9	1.5	107.9	390.1	21.7	1.9		1.6	0.4	739.9	29.4	40.9	25.2	1.1	3.1	19.4	4.9
P301	Regolith	Hayes et al., 2019	CZG7-10	7	10.7	1.67	0.0501	0.37	0.0189057	-0.187	0.0342112	0.29	0.0627333	0.505405	0.0701505	0.494277	0.0701505	158.9	6317.67	9.4	7.1	113.7	28.1	65.2	10.2	9.4	87.7	18.5	11.1	1.2	93.1	432.1	18.9	1.4	4	5.7	12.5	665.7	31	66.7	31		1.8	11.5	5.3
* Blank cells correspond to values below detection limits of XRF; all concentrations reported in ppm and measured on pressed pellets

## Sheet: G48191
Riebe, C.S., et al., 2021, Anisovolumetric weathering in granitic saprolite controlled by climate and erosion rates: Geology, v. 49, https://doi.org/10.1130/G48191.1
